# Supplementary material
Source: Elsevier journal article supplement (https://rcastoragev2.blob.core.windows.net/6e8b2cdc73f3a971967539920f3cf4f3/mmc1.pdf)
Supplement: mmc1 [file mmc1.pdf]

**Supplemental Information**

**Intracellular *Mycobacterium tuberculosis***

**Exploits Multiple Host Nitrogen Sources**

**during Growth in Human Macrophages**

**Khushboo Borah, Martin Beyß, Axel Theorell, Huihai Wu, Piyali Basu, Tom A. Mendum, Katharina Nöh, Dany J.V. Beste, and Johnjoe McFadden**

Figure S1

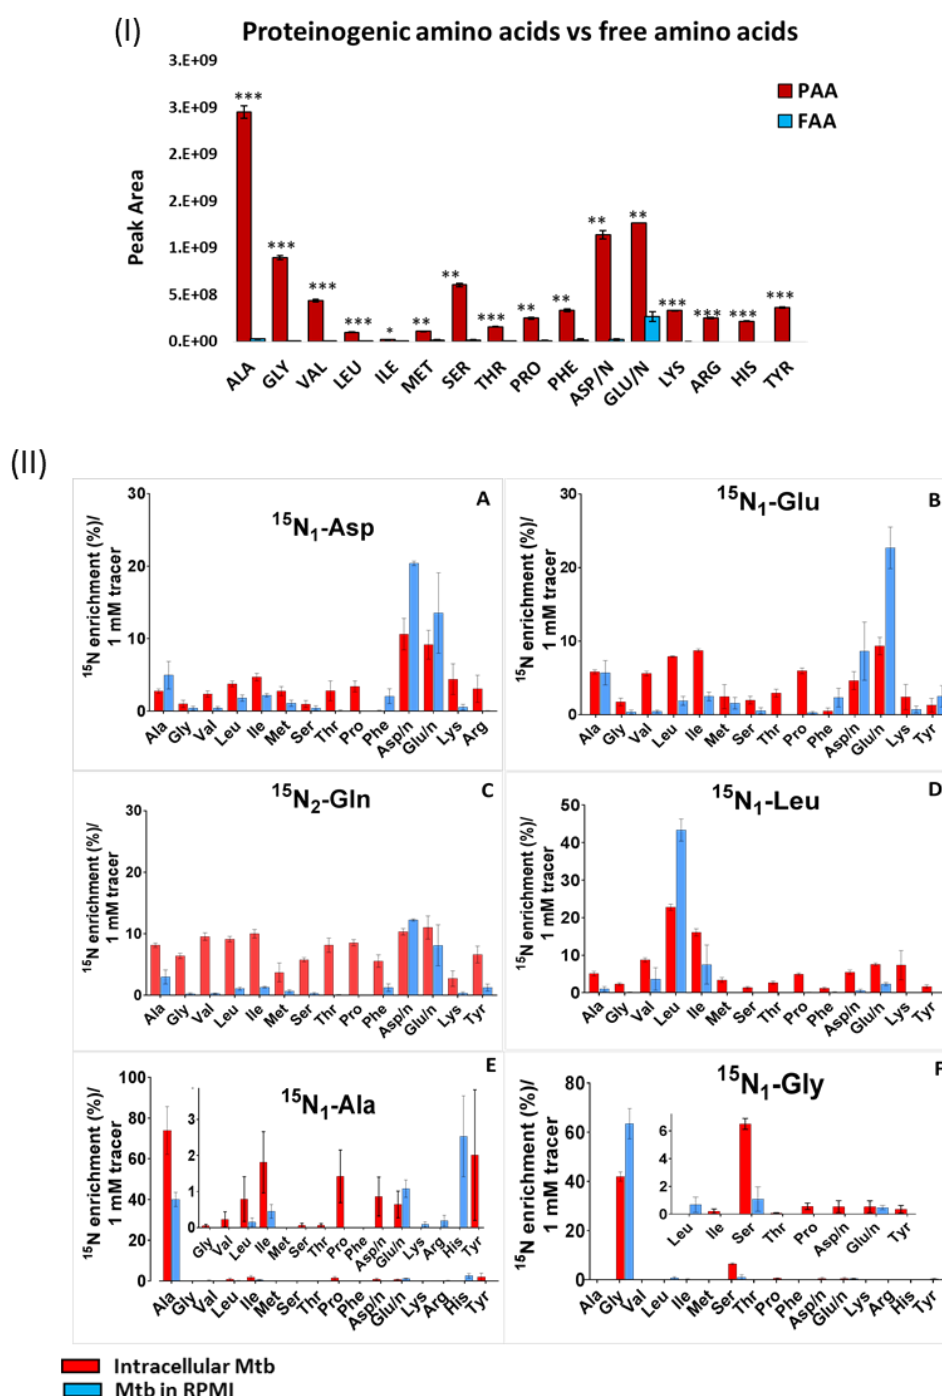

Figure S1 (I) **Relative abundance of free and proteinogenic amino acids in Mtb, Related STAR Methods.** Amino acids- free and proteinogenic were harvested by quenching Mtb cells in methanol:chloroform (2:1), followed by polar/non-polar biphasic separation of free (FAA) amino acids and proteinogenic amino acids (PAA). Free amino acids in the polar phase were dried for GC-MS analysis and proteinogenic amino acids in the non-polar phase were isolated by centrifugation and hydrolysed in 6M HCl, followed by GC-MS analysis. Values are mean  $\pm$  SEM from 2 technical replicates. Statistical significance, \*  $P < 0.05$ ; \*\*  $p < 0.005$ ; \*\*\*  $P < 0.0005$ . (II)  **$^{15}\text{N}$  enrichment of amino acids measured in intracellular Mtb and RPMI grown Mtb (control), Related to Figure 1, STAR Methods.** Measurements for intracellular Mtb and RPMI grown Mtb were obtained from experiments using tracers-  $^{15}\text{N}_1\text{-Asp}$  (A),  $^{15}\text{N}_1\text{-Glu}$  (B),  $^{15}\text{N}_2\text{-Gln}$  (C),  $^{15}\text{N}_1\text{-Leu}$  (D),  $^{15}\text{N}_1\text{-Ala}$  (E) and

$^{15}\text{N}_1$ -Gly (F). Enrichments were measured ((normalized for each 1mM tracer) in the protein-derived amino acids of intracellular Mtb and RPMI grown Mtb following incubation with the tracers for 48 h. Values are mean  $\pm$  SEM from 3-8 biological replicates for intracellular Mtb and from 3 biological replicates for RPMI grown Mtb respectively.

**Figure S2**

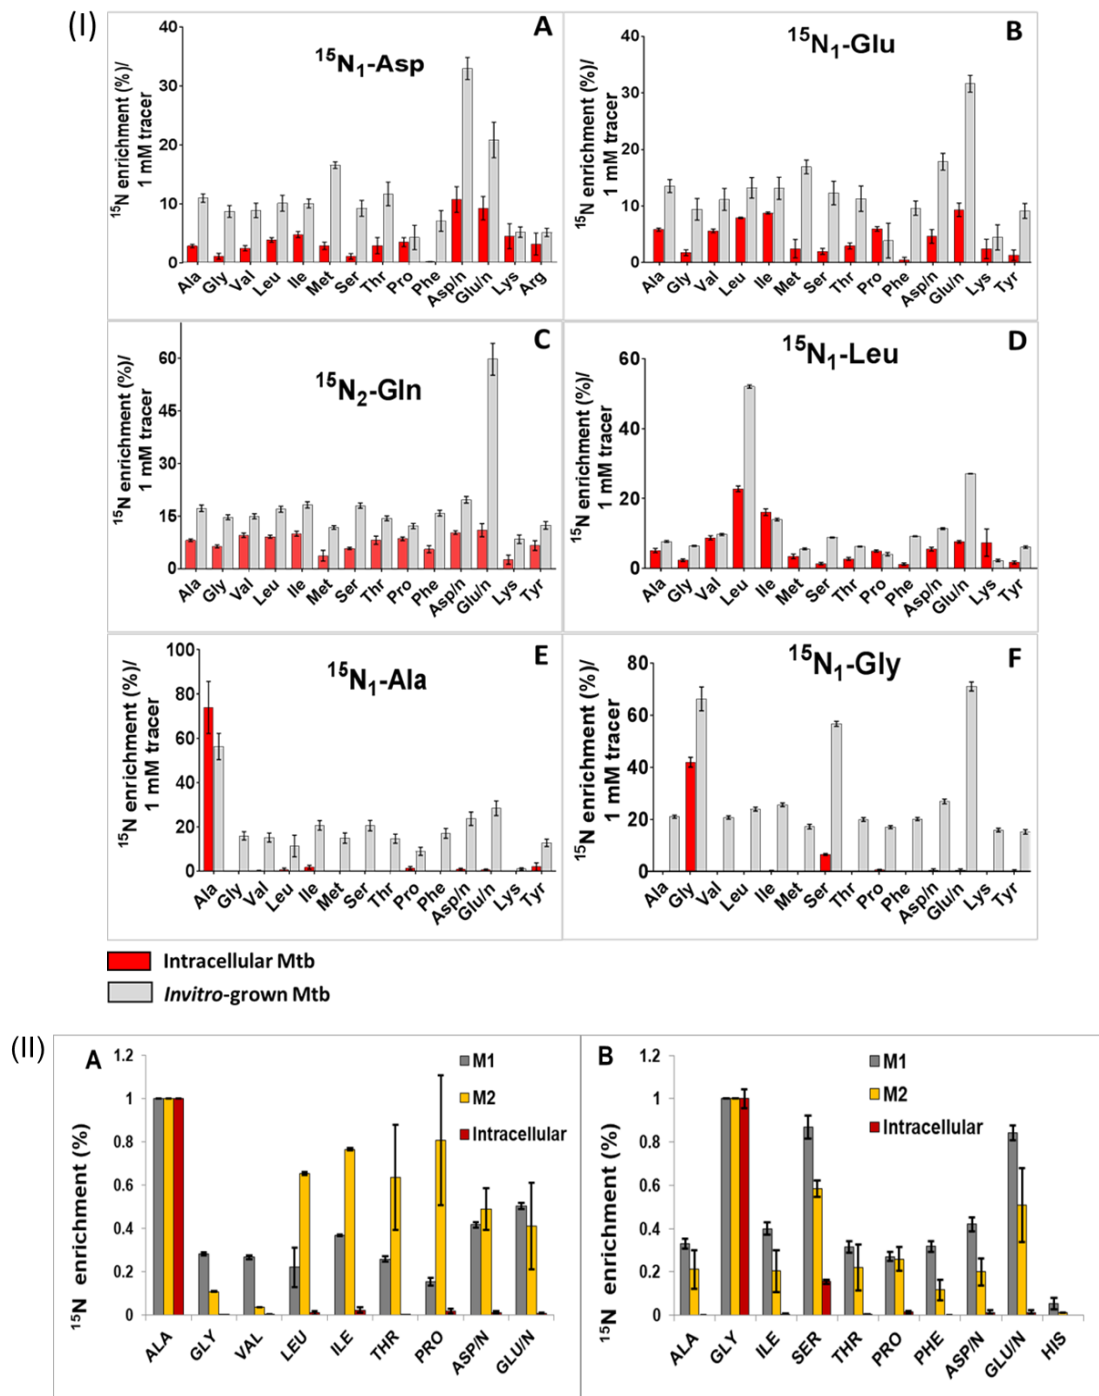

Figure S2. (I)  $^{15}\text{N}$  enrichment of amino acids measured in intracellular Mtb and *in vitro*-grown Mtb, Related to Fig. 1. Data is shown for intracellular Mtb and *in vitro*-grown Mtb in Roisins minimal media following 48 h incubation with each of the tracers  $^{15}\text{N}_1$ -Asp (A),  $^{15}\text{N}_1$ -Glu (B),  $^{15}\text{N}_2$ -Gln (C),  $^{15}\text{N}_1$ -Leu (D),  $^{15}\text{N}_1$ -Ala (E) and  $^{15}\text{N}_1$ -Gly (F). After incubation, enrichments were measured (normalized for

each 1mM tracer) in the protein-derived amino acids of intracellular Mtb isolated from the macrophage and from Mtb incubated in RPMI. Values are mean  $\pm$  SEM from 3-8 biological replicates for intracellular Mtb and from 3 biological replicates for *in vitro*-grown Mtb respectively. (II) **Comparison of amino acid extraction methods M1 vs M2 from *in vitro*-grown Mtb, Related to Figure 1, STAR Methods.** M1- the original method used in the manuscript to obtain measurements in Fig. 1D and M2 is the method followed exactly like for the amino acid harvest from intracellular Mtb (Fig. 1A) with extensive washing. We performed quantitative comparisons of M1, M2 with the intracellular data (Fig. 1A). Fractional labelling was compared for the two amino acid tracers  $^{15}\text{N}_1$ -ALA (A) and  $^{15}\text{N}_1$ -GLY (B). The enrichments were normalized to the parent amino acid labels for quantitative comparisons across the three methods used for *in vitro* and intracellular Mtb. Students t-test and Holm-Sidak statistical analysis found no significant differences between the enrichment profiles measured with M1 and M2. Values are mean  $\pm$  SEM from 3-8 biological replicates for intracellular Mtb and from 3 biological replicates for *in vitro*-grown Mtb respectively.

**Figure S3**

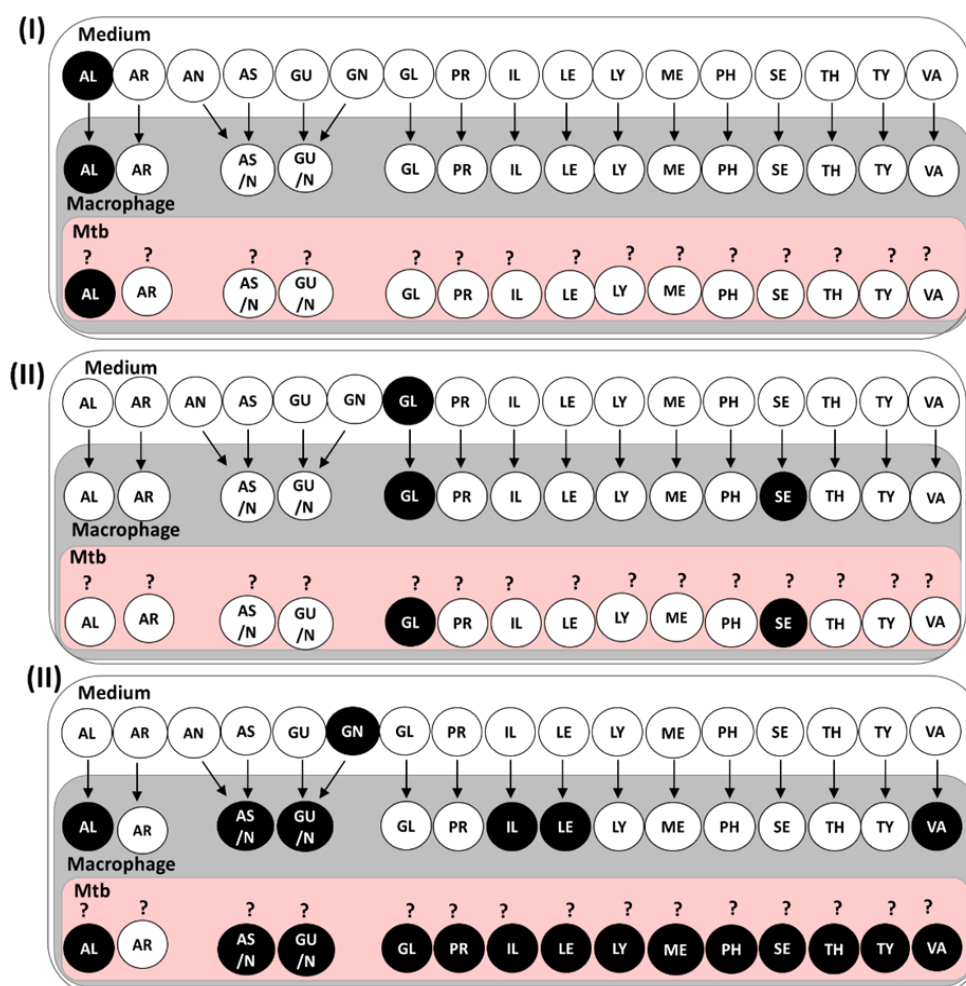

**Figure S3. Qualitative  $^{15}\text{N}$  Labelling patterns of intracellular Mtb, infected macrophages and growth medium, Related to STAR Methods.** The pattern is shown for the tracers-  $^{15}\text{N}_1$ -Ala (I),  $^{15}\text{N}_1$ -Gly (II) and  $^{15}\text{N}_2$ -Gln (III). Labeled amino acids are filled in black and the unlabelled amino acids in white. Amino acids acquired directly from the medium by infected macrophage are indicated by arrows. The uncertainty of direct or indirect uptake of amino acids by Mtb from the macrophage is indicated by ?. Abbreviations for amino acids- AL (alanine), AR (arginine), AN (asparagine), AS (aspartate), AS/N (aspartate/asparagine), GU (glutamate), GN (glutamine), GU/N

(glutamate/glutamine), GL (glycine), PR (proline), IL (isoleucine), Le (leucine), LY (lysine), ME (methionine), PH (phenylalanine), SE (serine), TH (threonine), TY (tyrosine) and VA (valine).

**Figure S4**

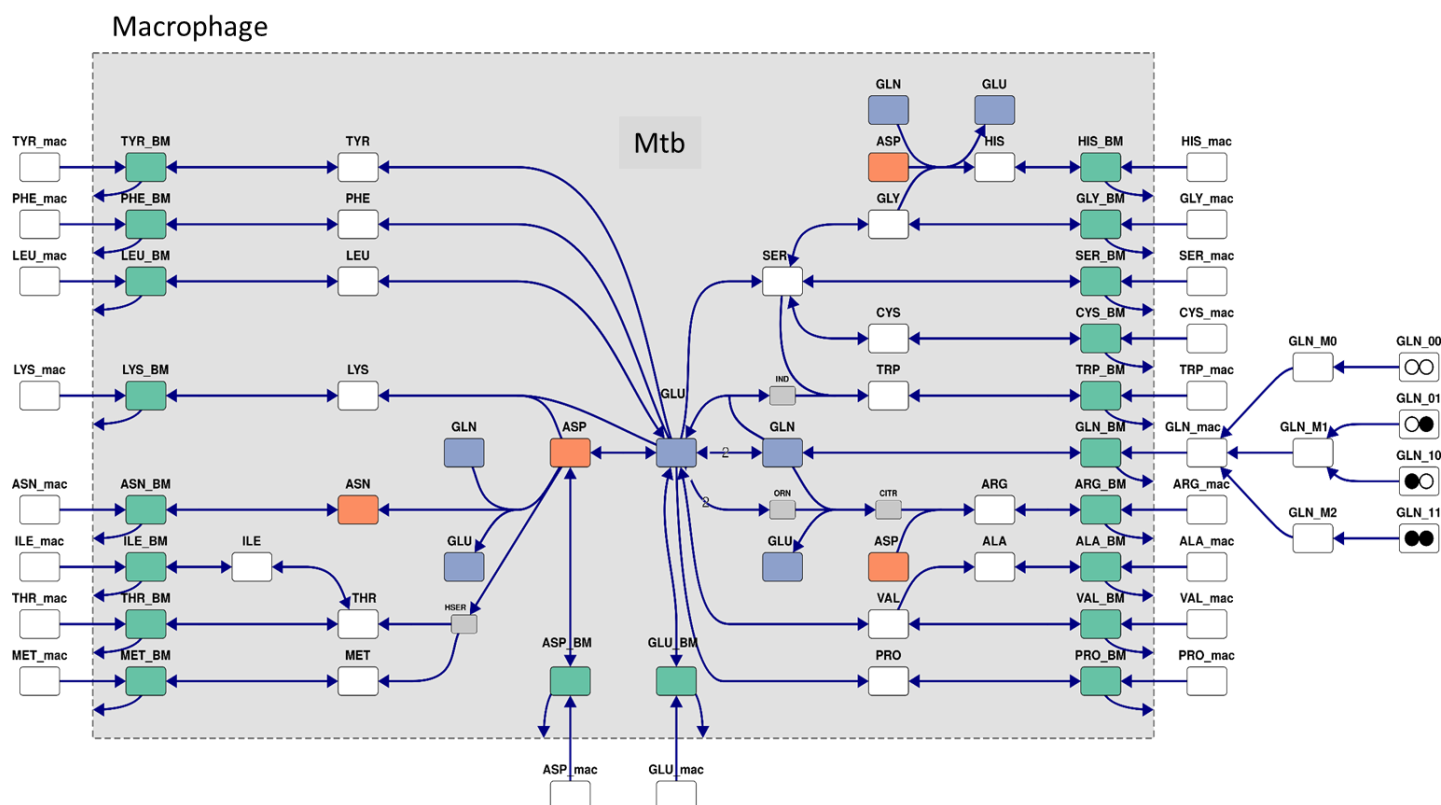

Figure S4.  $^{15}\text{N}$  FSRA metabolic network of Mtb, Related to Figure 5 and Table 1. Network model of nitrogen metabolism. On the right, the input pool deconvolution is shown for GLN (glutamine). Biomass pools are coloured in green. ASP/ASN and GLN/GLU pairs occur several times in the network and are coloured in red and blue, respectively. Grey coloured metabolites indicate intermediate pools. White boxes inside the MTB box code for *de novo* synthesized amino acids. The following abbreviations are used: CITR (citrulline), HSER (homoserine), IND (indole) and ORN (ornithine).

**Figure S5**

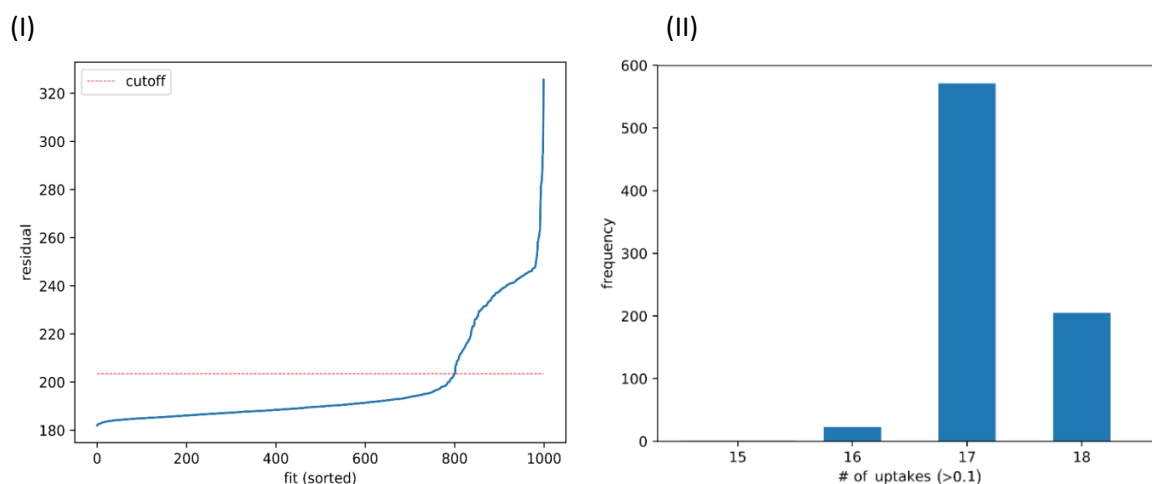

Figure S5. (I) **Residual values, Related to Table 1 and STAR Methods.** Residual values of 1,000 flux estimations sorted by size. Fits with residual values below the red line (cut-off=182.01) were accepted and used for interpretation. (II) **Histogram showing the total number of amino acids taken up from the macrophage, Related to Table 1 and STAR methods.**

Figure S6

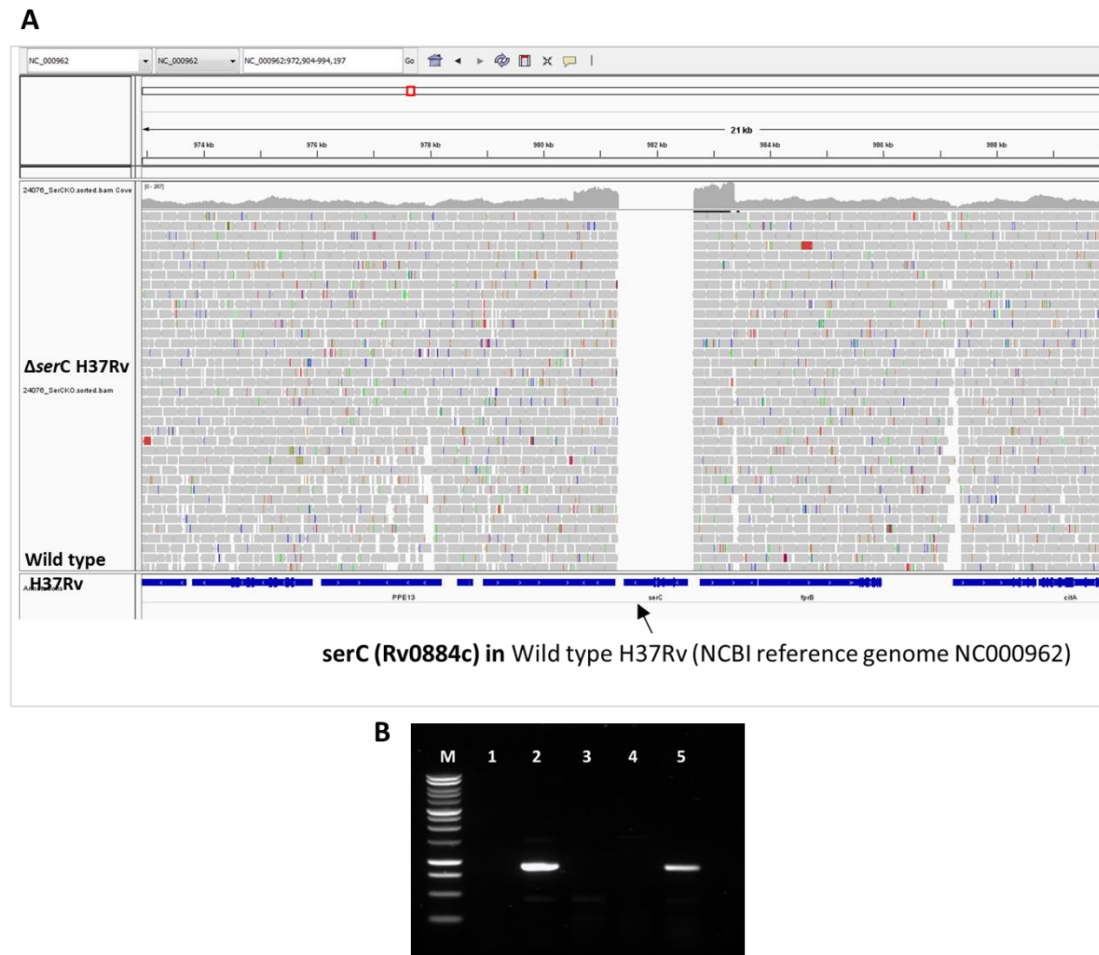

Figure S6. **Confirmation of  $\Delta$ serC mutant and complement  $\Delta$ serC::SERC strains, Related to STAR methods.** (A) Sequence comparisons between the wild type and  $\Delta$ serC H37Rv strains using Artemis. The comparisons show a gap in *serC* (Rv0884c) gene in the mutant strain confirming the deletion of the gene (Data file S5). (B) PCR analysis to confirm the complement  $\Delta$ serC::SERC. 923kb PCR product of *hsp60* promoter and *serC* gene was amplified from the pMV361*serC* construct (lane 2) and  $\Delta$ serC::SERC genomic DNA (gDNA) (lane 5) confirming the complement to have the integrated construct pMV361*serC*. Marker-M, 1- water control, 2- pMV361*serC* plasmid, 3- WT H37Rv gDNA , 4-  $\Delta$ serC H37Rv gDNA and 5-  $\Delta$ serC::SERC H37Rv gDNA.

Table S1. **A- Strains and plasmids used for construction of  $\Delta serC$  mutant and complement  $\Delta serC::SERC$  strains, Related to STAR Methods. B- Primers used for construction of  $\Delta serC$  mutant and complement  $\Delta serC::SERC$  strains, Related to STAR methods.**

A

| Strain                                          | Genotype and relevant characteristics                                                                                                                | Reference or source      |
|-------------------------------------------------|------------------------------------------------------------------------------------------------------------------------------------------------------|--------------------------|
| <i>Escherichia coli</i> DH5 $\alpha$            | Competent cells                                                                                                                                      | Beste et al., 2013       |
| <i>E. coli</i> HB101                            | F <sup>-</sup> , thi-1, hsdS20 (rB <sup>-</sup> , mB <sup>-</sup> ), supE44, recA13, ara-14, leuB6, proA2, lacY1, galK2, rpsL20 (strr), xyl-5, mtl-1 | Invitrogen               |
| <i>E. TOP10</i>                                 | Competent cells, HYG <sup>R</sup>                                                                                                                    | Thermo Fisher Scientific |
| <i>E. coli</i> DH5 $\alpha$ -pMV361 <i>serC</i> | Strain harbouring pMV361 <i>serC</i> construct, KAN <sup>R</sup>                                                                                     | This work                |
| <i>M. smegmatis</i> mc <sup>2</sup> 155         | Easily transformable strain, used for phage preparation                                                                                              | Baradov et al., 2002     |
| <b>Plasmid</b>                                  |                                                                                                                                                      |                          |
| pYUB854                                         | Cosmid vector, with res sites flanking the HYG <sup>R</sup> gene                                                                                     | Bardarov et al. 2002     |
| pYUB854_LF                                      | pYUB854 + 716 bp left flanking sequence of <i>serC</i> (Rv0884c)                                                                                     | This work                |
| pYUB854_RF                                      | pYUB854 + 787 bp right flanking sequence of <i>serC</i> (Rv0884c)                                                                                    | This work                |
| pYUB854_LFRF-AES                                | pYUB854 + left and right flanking sequence of <i>serC</i> (Rv0884c)                                                                                  | This work                |
| pMV361                                          | <i>E. coli</i> -Mycobacteria shuttle vector, groEL2 ( <i>hsp60</i> ) promoter, KAN <sup>R</sup> , OriM                                               | Stover et al., 1991      |
| pMV361 <i>serC</i>                              | pMV361 containing <i>serC</i> (Rv0884c) gene, KAN <sup>R</sup>                                                                                       | This work                |
| <b>Phage</b>                                    |                                                                                                                                                      |                          |
| phAE159                                         | Mycobacterial phage                                                                                                                                  | Bardarov et al. 2002     |
| phAE159: $\Delta serC$                          | phAE159 + pYUB854_LFRF-AES, HYG <sup>R</sup>                                                                                                         | This work                |

B

| Primer Sequences                                                           |                                      |                                  |
|----------------------------------------------------------------------------|--------------------------------------|----------------------------------|
| Gene/loci                                                                  | Forward primer (5'-3')               | Reverse primer (5'-3')           |
| <i>serC</i> (Rv0884c) upstream (left flanking region), allelic exchange    | GGTGGTCTTAAGATGATCGGATGCA<br>GCGACTT | GGTGGTTCTAGACTGGTGGCTGGGTCATAGTG |
| <i>serC</i> (Rv0884c) downstream (right flanking region), allelic exchange | GGTGGTAAGCTTTAGAGTGCGCACG<br>TAACAGG | GGTGGTACTAGTCACATCTTCCCAGGCAGGTA |
| <i>serC</i> (Rv0884c) PCR to construct pMV361 <i>serC</i>                  | GGTGGTGAATTCATGGCCGACCAGC<br>TCAC    | GGTGGTAAGCTTCTAAAGCCGCTCGACCACC  |
| $\Delta serC::SERC$ confirmation PCR                                       | ACATACTCACCCGGATCGGA                 | CGAAGTAGTAGGCGTCGGTC             |
